# Supplementary material for: Cefotaxime incorporated bimetallic silver-selenium nanoparticles: promising antimicrobial synergism, antibiofilm activity, and bacterial membrane leakage reaction mechanism
Source: Royal Society of Chemistry journal article supplement (doi:10.1039/d2ra04717a), 2022-01-01
Supplement: d2ra04717a1.pdf [file d2ra04717a1.pdf]

**Table S1: Antibiotic sensitivity test.**

| <b>Strains</b><br><b>Antibiotics</b>    | <b><i>S. aureus</i></b> | <b><i>Enterococcus sp.</i></b> | <b><i>E. coli</i></b> | <b><i>P. aeruginosa</i></b> | <b><i>K. pneumoniae</i></b> | <b><i>C. albicans</i></b> |
|-----------------------------------------|-------------------------|--------------------------------|-----------------------|-----------------------------|-----------------------------|---------------------------|
| <b>Amoxicillin/<br/>clavulanic acid</b> | I                       | R                              | R                     | R                           | R                           | R                         |
| <b>Cefotaxime</b>                       | <b>R</b>                | <b>R</b>                       | <b>R</b>              | <b>R</b>                    | <b>R</b>                    | <b>R</b>                  |
| <b>Ceftazidim</b>                       | I                       | I                              | R                     | S                           | R                           | R                         |
| <b>Ceftriaxone</b>                      | S                       | I                              | R                     | R                           | R                           | R                         |
| <b>Amikacin</b>                         | R                       | I                              | I                     | S                           | S                           | R                         |
| <b>Amoxicillin</b>                      | I                       | S                              | R                     | R                           | R                           | R                         |
| <b>Cefoperazone</b>                     | R                       | I                              | R                     | R                           | R                           | R                         |
| <b>Ciprofloxacin</b>                    | I                       | R                              | S                     | R                           | I                           | R                         |
| <b>Imipenem</b>                         | S                       | I                              | I                     | S                           | S                           | R                         |

**S= Susceptible, I= Intermediate, and R= Resistant.**

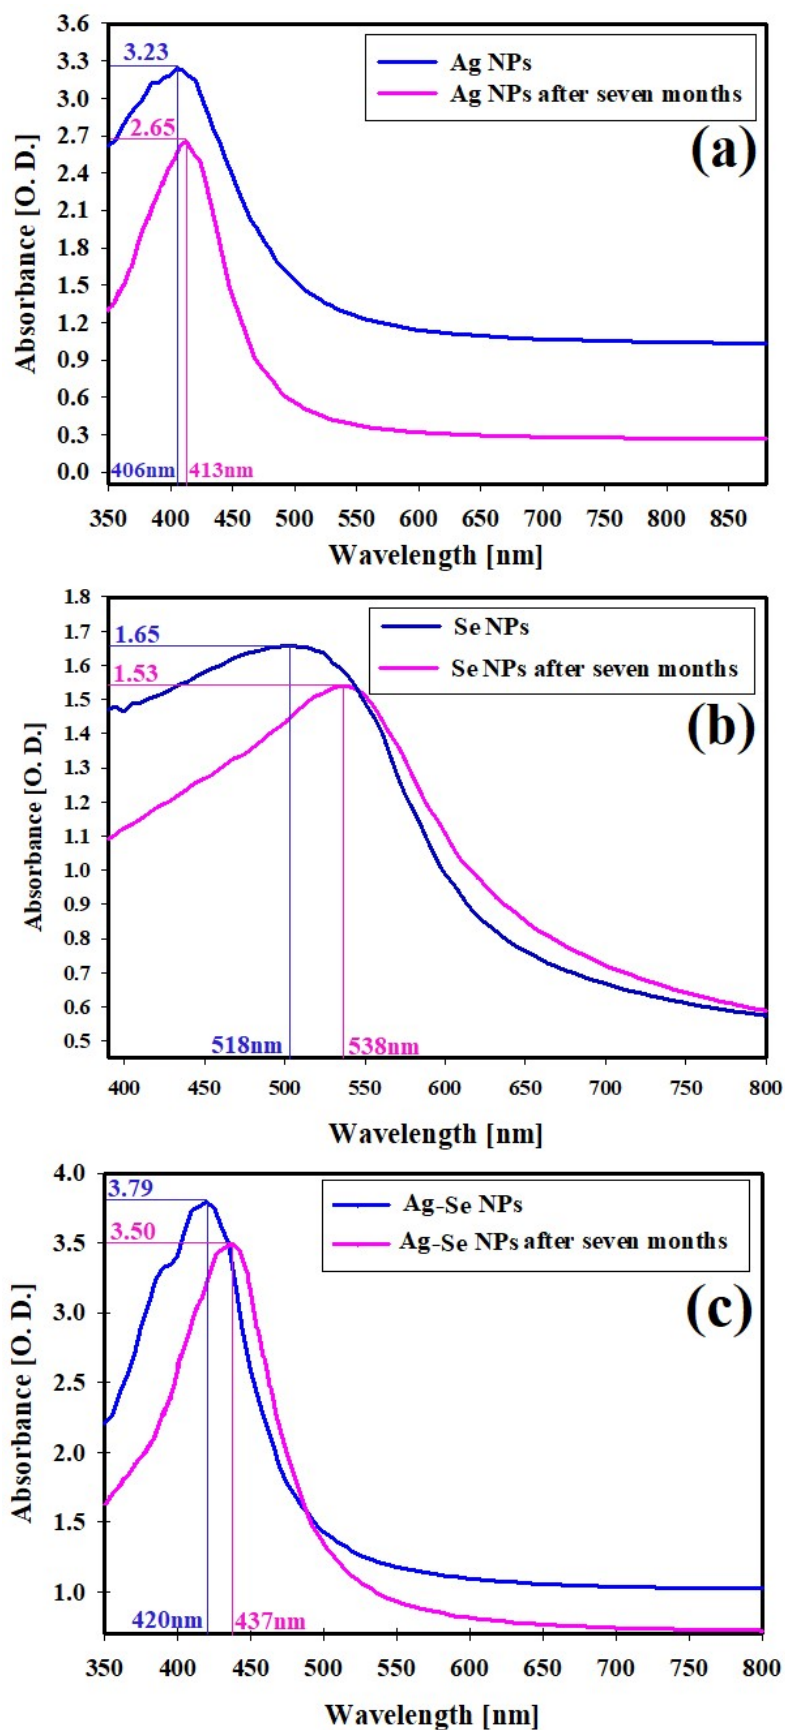

**Figure S1: UV-Vis. spectrophotometry regarding the stability determination where (a) stability of Ag NPs after seven months, (b) stability of Se NPs after seven months, and (c), stability of bimetallic Ag-Se NPs after seven months .**
